# Supplementary material
Source: Springer Nature journal article supplement (https://www.springermedizin.de/resource/supplementary/12879_2010_1213_MOESM1_ESM.pdf/9442102)

**S. pyogenes Isolates no**

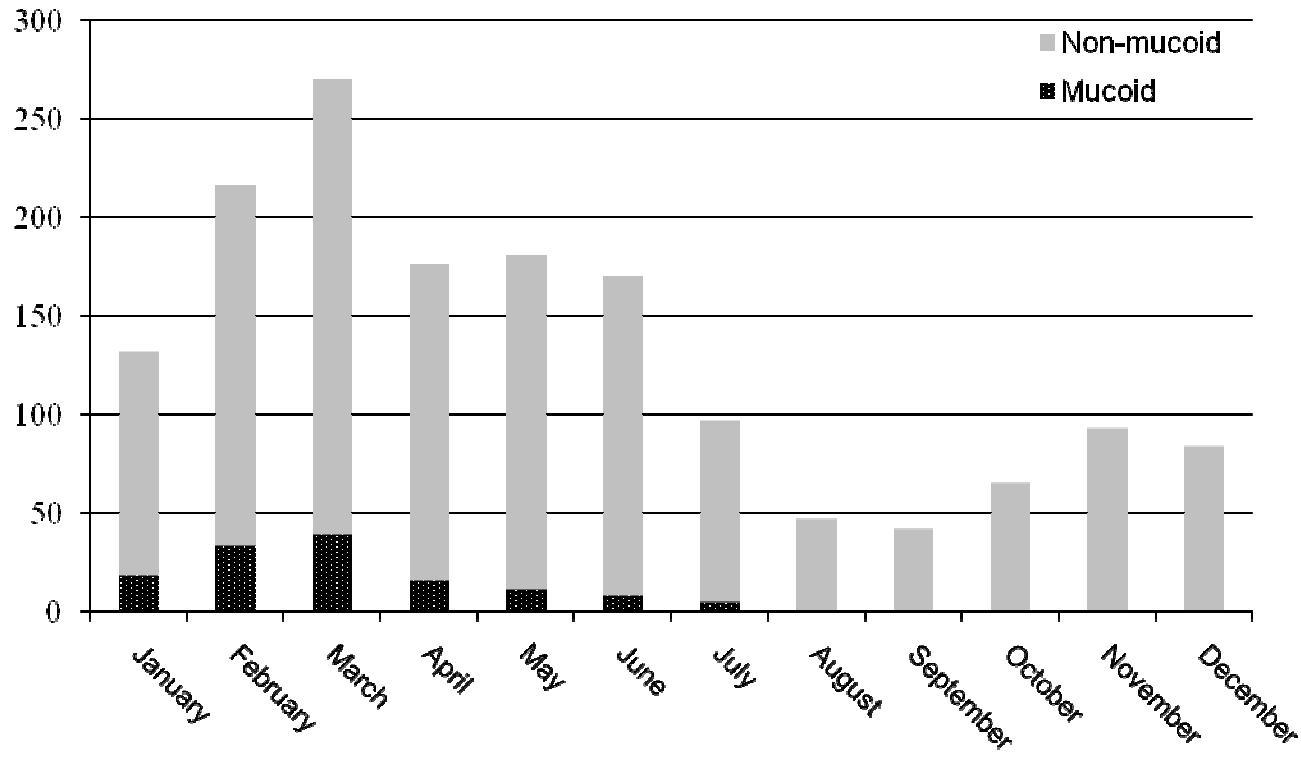

Supplement: MOESM1 [file 9442102]
